# Supplementary material for: R2DT is a framework for predicting and visualising RNA secondary structure using templates
Source: PubMed Central journal article supplement (PMC8190129; doi:10.1038/s41467-021-23555-5), 2021-06-09
Supplement: 41467_2021_23555_MOESM1_ESM.pdf [file 41467_2021_23555_MOESM1_ESM.pdf]

# Supplementary Information

**Supplementary Table 1.** Newly developed R2DT templates using experimental data.

| <b>rRNA type</b> | <b>Species</b>                       | <b>Clade</b>                   | <b>Supporting experimental data</b> |
|------------------|--------------------------------------|--------------------------------|-------------------------------------|
| LSU              | <i>Mycobacterium tuberculosis</i>    | Bacteria (Actinobacteria)      | 5V7Q:A                              |
| LSU              | <i>Staphylococcus aureus</i>         | Bacteria (Firmicutes)          | 4WF9:X                              |
| LSU              | <i>Tetrahymena thermophila</i>       | Eukaryota                      | 4V8P:D1+C2                          |
| LSU              | <i>Bacillus subtilis</i>             | Bacteria (Firmicutes)          | 5NJT:U                              |
| LSU              | <i>Homo sapiens</i> mitochondria     | Eukaryota                      | 5OOL:A                              |
| LSU              | <i>Homo sapiens</i>                  | Eukaryota                      | 6EK0:L5+L8                          |
| LSU              | <i>Dictyostelium discoideum</i>      | Eukaryota                      | 5AN9:N                              |
| LSU              | <i>Thermus thermophilus</i>          | Bacteria (Deinococcus-Thermus) | 4Y4O:2A                             |
| LSU              | <i>Haloarcula marismortui</i>        | Archaea                        | 4V9F:0                              |
| LSU              | <i>Mycobacterium smegmatis</i>       | Bacteria (Actinobacteria)      | 5O60:A                              |
| LSU              | <i>Plasmodium falciparum</i>         | Eukaryota                      | 3J79:A+C                            |
| LSU              | <i>Saccharomyces cerevisiae</i>      | Eukaryota                      | 5TBW:1+4                            |
| LSU              | <i>Spinacia oleracea</i> chloroplast | Eukaryota                      | 6ERI:AA                             |
| LSU              | <i>Escherichia coli</i>              | Bacteria (Gammaproteobacteria) | 5J7L:DA                             |
| LSU              | <i>Deinococcus radiodurans</i>       | Bacteria (Deinococcus-Thermus) | 4IOA:X                              |
| LSU              | <i>Drosophila melanogaster</i>       | Eukaryota                      | 4V6W:A5                             |
| LSU              | <i>Kluyveromyces lactis</i>          | Eukaryota                      | 4V91:1+4                            |

|         |                                             |                                       |                       |
|---------|---------------------------------------------|---------------------------------------|-----------------------|
| LSU     | Lokiarchaeota F3H4                          | Archaea                               | Based on <sup>1</sup> |
| LSU     | Lokiarchaeota GC1475                        | Archaea                               | Based on <sup>1</sup> |
| LSU     | <i>Tetrahymena thermophila</i> mitochondria | Eukaryota                             | Based on <sup>1</sup> |
| SSU     | <i>Homo sapiens</i>                         | Eukaryota                             | 4V6X:B2               |
| SSU     | <i>Thermus thermophilus</i>                 | Bacteria<br>(Deinococcus-<br>Thermus) | 4V51:AA               |
| SSU     | <i>Pyrococcus furiosus</i>                  | Archaea                               | 4V6U:A2               |
| SSU     | <i>Drosophila melanogaster</i>              | Eukaryota                             | 4V6W:B2               |
| SSU     | <i>Saccharomyces cerevisiae</i>             | Eukaryota                             | 4V88:A2               |
| SSU     | <i>Trypanosoma brucei</i>                   | Eukaryota                             | 4V8M:AA               |
| SSU     | <i>Escherichia coli</i>                     | Bacteria<br>(Gammaproteob<br>acteria) | 4V9D:AA               |
| RNAse P | <i>Methanocaldococcus jannaschii</i>        | Archaea                               | 6K0A:A                |
| RNAse P | <i>Bacillus stearothermophilus</i>          | Bacteria                              | 2A64:A                |
| RNAse P | <i>Thermotoga maritima</i>                  | Bacteria                              | 3Q1R:A                |
| RNAse P | <i>Homo sapiens</i>                         | Eukaryota                             | 6AHR:A                |

**Supplementary Table 2.** Summary of template to diagram similarity by phylogenetic rank for RefSeq rRNA sequences.

| <b>Taxonomic Rank</b> | <b>Number of nucleotides positioned exactly as in template</b> | <b>Number of nucleotides inserted compared to template</b> | <b>Number of nucleotides requiring repositioning compared to template</b> | <b>Total number of displayed nucleotides</b> | <b>Number of diagrams</b> |
|-----------------------|----------------------------------------------------------------|------------------------------------------------------------|---------------------------------------------------------------------------|----------------------------------------------|---------------------------|
| species               | 259,034 (97.%)                                                 | 4,175 (1.6%)                                               | 3,896 (1.5%)                                                              | 267,105                                      | 147 (.6%)                 |
| genus                 | 538,357 (98.%)                                                 | 5,759 (1.%)                                                | 5,332 (1.%)                                                               | 549,448                                      | 384 (1.6%)                |
| family                | 868,585 (98.%)                                                 | 9,279 (1.%)                                                | 8,629 (1.%)                                                               | 886,493                                      | 558 (2.3%)                |
| order                 | 1,390,705 (98.%)                                               | 15,281 (1.1%)                                              | 13,761 (1.%)                                                              | 1,419,747                                    | 860 (3.6%)                |
| class                 | 6,264,956 (97.5%)                                              | 68,719 (1.1%)                                              | 89,065 (1.4%)                                                             | 6,422,740                                    | 3,844 (16.1%)             |
| phylum                | 7,094,429 (97.3%)                                              | 104,029 (1.4%)                                             | 91,687 (1.3%)                                                             | 7,290,145                                    | 4,780 (20.%)              |
| kingdom               | 20,172,007 (95.4%)                                             | 557,422 (2.6%)                                             | 420,121 (2.%)                                                             | 21,149,550                                   | 13,224 (55.5%)            |
| superkingdom          | 28,360 (94.2%)                                                 | 757 (2.5%)                                                 | 997 (3.3%)                                                                | 30,114                                       | 8 (.%)                    |
| root                  | 20,410 (37.5%)                                                 | 838 (1.5%)                                                 | 33,142 (60.9%)                                                            | 54,390                                       | 38 (.2%)                  |
| <b>Total</b>          | <b>36,636,843 (96.2%)</b>                                      | <b>766,259 (2.%)</b>                                       | <b>666,630 (1.8%)</b>                                                     | <b>38,069,732</b>                            | <b>23,843</b>             |

**Supplementary Table 3.** Sample of R2DT run times for a range of sequences. Measurements were taken on a CentOS machine with 10 GB of RAM and an Intel(R) Xeon(R) Gold 6252 CPU at 2.10 GHz.

| PDB ID           | RNAcentral identifier | Sequence length | RNA type                                   | R2DT run time (m:ss) |
|------------------|-----------------------|-----------------|--------------------------------------------|----------------------|
| 6AHR<br>Chain A  | URS000013F331_9606    | 417             | <i>Homo sapiens</i> RNase P                | 0:10                 |
| 4V4Q<br>Chain AA | URS00000ABFE9_562     | 1,542           | <i>Escherichia coli</i> SSU rRNA           | 0:15                 |
| 6G4W<br>Chain 2  | URS0000D56C31_9606    | 1,882           | <i>Homo sapiens</i> SSU rRNA               | 0:15                 |
| 6RXV<br>Chain C2 | URS0000EEACFC_209285  | 230             | <i>Chaetomium thermophilum</i> U3 snoRNA   | 0:18                 |
| 3J9M<br>Chain A  | URS000080E357_9606    | 1,559           | <i>Homo sapiens</i> mitochondrial SSU rRNA | 0:41                 |
| 5W4K<br>Chain 1w | URS00005AA258_562     | 76              | <i>Escherichia coli</i> tRNA               | 0:45                 |
| 6EK0<br>Chain L7 | URS000002B0D5_9606    | 120             | <i>Homo sapiens</i> 5S rRNA                | 0:46                 |
| 4V4Q<br>Chain BB | URS00004B0F34_562     | 2,904           | <i>Escherichia coli</i> LSU rRNA           | 0:49                 |
| 4UG0<br>Chain L5 | URS000086853A_9606    | 5,070           | <i>Homo sapiens</i> LSU rRNA               | 1:47                 |

## References

1. Penev, P. I. *et al.* Supersized ribosomal RNA expansion segments in Asgard archaea.  
doi:10.1101/2019.12.25.888164.
